# Dark Energy from Discrete Spacetime

Aaron D. Trout\*

Department of Mathematics, Chatham University, Pittsburgh, Pennsylvania, United States of America

## Abstract

Dark energy accounts for most of the matter-energy content of our universe, yet current theories of its origin rely on radical physical assumptions such as the holographic principle or controversial anthropic arguments. We give a better motivated explanation for dark energy, claiming that it arises from a small negative scalar-curvature present even in empty spacetime. The vacuum has this curvature because spacetime is fundamentally discrete and there are more ways for a discrete geometry to have negative curvature than positive. We explicitly compute this effect using a variant of the well known dynamical-triangulations (DT) model for quantum gravity. Our model predicts a time-varying non-zero cosmological constant with a current value,  $\Lambda \approx 10^{-123}$  in natural units, in agreement with observation. This calculation is made possible by a novel characterization of the possible DT action values combined with numerical evidence concerning their degeneracies.

**Citation:** Trout AD (2013) Dark Energy from Discrete Spacetime. PLoS ONE 8(12): e80826. doi:10.1371/journal.pone.0080826

**Editor:** Garret Cotter, University of Oxford, United Kingdom

**Received:** July 19, 2013; **Accepted:** October 15, 2013; **Published:** December 3, 2013

**Copyright:** © 2013 Aaron D. Trout. This is an open-access article distributed under the terms of the Creative Commons Attribution License, which permits unrestricted use, distribution, and reproduction in any medium, provided the original author and source are credited.

**Funding:** The author has no support or funding to report beyond his university salary.

**Competing Interests:** The author has declared that no competing interests exist.

\* E-mail: atrout@chatham.edu

## Introduction

Multiple independent sets of empirical data [1–4] indicate that about 70% of the matter and energy in our universe comes from a mysterious repulsive gravitational effect known as “dark energy”. Understanding the origin of this energy is one of the most important problems in physics. Our only current theories involve speculative physical assumptions or finely tuned parameters. One popular assumption is the holographic principle: the idea that the degrees of freedom in a region of space are encoded on the region’s boundary [5–14]. Other explanations assume the existence of exotic matter fields or modify the Lagrangian defining general relativity. One recent theory [15] even hypothesizes a connection between dark matter and dark energy. See [16,17] for reviews of various explanations of dark energy.

Our work provides a simpler, better motivated model for dark energy set within the well-known *dynamical triangulations* (DT) approach to quantum gravity. This model assumes no holographic principle, uses no additional matter fields or finely tuned parameters, and does not modify general relativity beyond the geometric discretization inherent in dynamical-triangulations spacetimes. In our model, a positive vacuum energy of the correct observed magnitude spontaneously arises from the entropic bias toward negative curvature states inherent in DT geometries. Note that treating gravity as an emergent mean-field phenomenon driven by entropic forces is a popular research perspective at the moment [18–24].

A reasonable prediction for dark-energy within a quantum-gravity theory is only significant if the theory approximates general relativity well at large distances. Why should we believe this about a theory that uses DT spacetime states? The progenitor of the DT theory, called the *Regge calculus*, has been used successfully in numerical general-relativity and quantum gravity for nearly five decades [25–31]. The DT model itself [32–36] and its descendant, *causal dynamical triangulations* (CDT) [32,34,35,37–40] have been

studied for nearly two decades. The numerous successes achieved by these theories give confidence that our model can describe general relativity at length-scales much larger than Planck’s length.

The model presented in this paper uses the same discretization of geometry and the same action as the DT theory. However, it is not identical to DT because it puts restrictions on the set of triangulations which contribute to the partition function. These kind of restrictions are also what distinguish DT from CDT although our restrictions are distinct from those in CDT. Note that it is not our purpose to advocate “triangulations” as the ultimate structure of spacetime. Indeed, in our calculation the discrete nature of geometry may be removed at the end without altering the predicted vacuum energy. We suspect that the effect described in this paper is actually a generic feature of any quantum-gravity theory which predicts a discrete spacetime geometry and which has general relativity as its large-distance limit.

## Background Material

General relativity can be written in the Lagrangian formalism using the Einstein-Hilbert action, which in natural units is

$$\mathcal{A}_{EH}(g_{\mu\nu}) = \int_M \left[ \frac{1}{16\pi} (R - 2\Lambda) + \mathcal{L}_m \right] \sqrt{-g} d^n x. \quad (1)$$

Here  $M$  is a closed  $n$ -manifold,  $g_{\mu\nu}$  a Lorentzian metric,  $R$  scalar-curvature,  $\Lambda$  the cosmological constant,  $\mathcal{L}_m$  the Lagrangian for matter and  $\sqrt{-g} d^n x$  the standard volume element. See Table 1 for a list of commonly used symbols. Note, both  $R$  and  $\mathcal{L}_m$  depend on  $g_{\mu\nu}$  while  $\Lambda$  does not. Also note that  $R$  is the only term in this action with a physically distinguished zero value. In quantum field theory on a fixed background geometry, an arbitrary constant can

**Table 1.** Meaning of Commonly Used Symbols.

| Symbol                               | Meaning                                                                                                 |
|--------------------------------------|---------------------------------------------------------------------------------------------------------|
| $M$                                  | closed $n$ -manifold                                                                                    |
| $T$                                  | triangulation of a closed $n$ -manifold                                                                 |
| $\ell$                               | edge length of all edges in $T$                                                                         |
| $\mathcal{T}(M)$                     | set of all triangulations of $M$                                                                        |
| $\mathcal{T}_K(M)$                   | set of all triangulations of $M$ with $K$ $n$ -simplices                                                |
| $N_i(T)$                             | number of $i$ -simplices in a triangulation $T$                                                         |
| $\mu(T)$                             | average hinge-degree of a triangulation $T$                                                             |
| $\mu_n^*$                            | "flat" hinge-degree, $\mu_n^* = \frac{2\pi}{\theta_n}$ , $\mu_3^* \approx 5.1$ (irrational)             |
| $\theta_n$                           | dihedral angle in a regular $n$ -simplex, $\theta_n = \cos^{-1}(1/n)$                                   |
| $\Lambda$                            | cosmological constant                                                                                   |
| $g_{\mu\nu}$                         | Lorentzian metric                                                                                       |
| $R$                                  | scalar curvature of $g_{\mu\nu}$                                                                        |
| $\mathcal{A}_{EH}(g_{\mu\nu})$       | Einstein-Hilbert action                                                                                 |
| $\mathcal{A}_{EH}^{vac}(g_{\mu\nu})$ | vacuum Einstein-Hilbert action with $\Lambda=0$                                                         |
| $\mathcal{A}_R(T, \ell_1, \dots)$    | Regge action                                                                                            |
| $\mathcal{A}_{DT}(T, \ell)$          | dynamical triangulations (DT) action                                                                    |
| $\mathcal{A}_k$                      | a DT-action in the $N$ -action model                                                                    |
| $\delta\mathcal{A}$                  | minimum separation between actions, see equation (14)                                                   |
| $E(T)$                               | mean DT-action per volume for triangulation $T$                                                         |
| $E(\mu)$                             | mean DT-action per volume at mean hinge-degree $\mu$                                                    |
| $E_k$                                | a mean DT-action in the $N$ -action model                                                               |
| $S_k$                                | spacetime entropy in nats at mean-action $E_k$                                                          |
| $(E_{min}, E_{max})$                 | interval over which mean-actions are regularly spaced                                                   |
| $\delta E$                           | minimum separation between mean-actions, see equation (13)                                              |
| $V_k(\ell)$                          | volume of $k$ -simplex, all edge-lengths $\ell$ , $V_k(\ell) = \frac{\sqrt{k+1}}{k! \sqrt{2^k}} \ell^k$ |
| $V$                                  | spacetime volume $V = N_n(T)V_n(\ell)$                                                                  |
| $S^k$                                | $k$ -dimensional sphere                                                                                 |

In this table we list some of the commonly used symbols in this paper and their meanings.  
doi:10.1371/journal.pone.0080826.t001

be added to  $\mathcal{L}_m$  without changing the observed physics, allowing one to simply set  $\Lambda$  to zero. Thus, it is reasonable to argue, as we do in this paper, that the observed non-zero value of  $\Lambda$  arises from quantum effects related to the scalar-curvature field  $R$ .

Hilbert and Einstein showed that the critical points  $g_{\mu\nu}$  of this action satisfy the equations of motion

$$R_{\mu\nu} - \frac{1}{2}Rg_{\mu\nu} + \Lambda g_{\mu\nu} = 8\pi T_{\mu\nu}. \tag{2}$$

These are, of course, the field equations for general relativity. Here,  $R_{\mu\nu}$  is the Ricci curvature tensor and  $T_{\mu\nu}$  the stress-energy tensor for matter. In this work we restrict attention to the Einstein-Hilbert action for the vacuum with zero cosmological constant

$$\mathcal{A}_{EH}^{vac}(g_{\mu\nu}) = \frac{1}{16\pi} \int_M R \sqrt{-g} d^n x. \tag{3}$$

The critical points of  $\mathcal{A}_{EH}^{vac}$  are metrics which satisfy the vacuum field equations. These metrics are *Ricci flat* everywhere ( $R_{\mu\nu} = 0$  at every point) and therefore also *scalar flat* everywhere ( $R = 0$  at every point.) Thus these metrics have action exactly zero. Finally, in dimensions less than four, the Ricci tensor determines the full curvature tensor  $R_{\mu\nu\gamma\lambda}$ , so critical points of  $\mathcal{A}_{EH}^{vac}$  in these dimensions must actually be *flat* everywhere ( $R_{\mu\nu\gamma\lambda} = 0$  at each point.).

In his influential 1961 paper [25] Regge proposed a discretized version of  $\mathcal{A}_{EH}^{vac}$  which applies to triangulated piecewise-linear (PL) manifolds. A **triangulation**  $T$  of a closed  $n$ -manifold  $M$  is a combinatorial  $n$ -manifold homeomorphic to  $M$  given as an abstract simplicial complex. Assigning a length  $\ell_i$  to each edge in  $T$  uniquely defines a piecewise-linear metric on  $T$  provided these lengths satisfy some natural compatibility conditions. If we let  $N_k(T)$  denote the number of  $k$ -simplices in  $T$ , the **Regge action** is given by

$$\mathcal{A}_R(T, \ell_1, \dots, \ell_{N_1(T)}) = \frac{1}{16\pi} \sum_{\tau^{n-2} \in T} (2\pi - \theta(\tau^{n-2})) \text{Vol}(\tau^{n-2}). \tag{4}$$

In this equation, the sum runs over all codimension-2 simplices of  $T$  (called **hinges**),  $\theta(\tau^{n-2})$  is the total dihedral angle around the hinge  $\tau^{n-2}$ , and  $\text{Vol}(\tau^{n-2})$  is that hinge's volume. It is easy to insert a cosmological constant into this action, although here we do not. The possibility of incorporating matter fields into  $\mathcal{A}_R$  is a currently active topic of research. See [41–43].

Note that  $\mathcal{A}_R$  has a nice geometric interpretation. The summand in this action is the *angle defect* in a small triangle enclosing and perpendicular to the hinge  $\tau^{n-2} \in T$ , weighted by the volume of that hinge. Given the close relationship in classical non-euclidean geometry between angle defect and curvature, it is natural to interpret  $\mathcal{A}_R$  as a discrete measure of total curvature. Because of the success of the Regge action in describing general relativity, we will interpret  $\mathcal{A}_R$  as a discrete measure corresponding to the Einstein-Hilbert action, and thus to **total scalar-curvature**. Interpreting  $\mathcal{A}_R$  as a total curvature is also supported by the fact that, like point-wise curvature bounds in Riemannian geometry, bounds on the angle-defect for *all* hinges have profound topological consequences for  $M$ . See [44–47] for examples.

### The Dynamical-Triangulation Action

Suppose we fix the abstract simplicial complex  $T$  and consider  $\mathcal{A}_R$  as a function of the edge-lengths  $\ell_1, \dots, \ell_{N_1(T)}$  only. There is a large body of numerical evidence [26–29] that the critical points of this action define PL-metrics which behave like solutions  $g_{\mu\nu}$  to the vacuum field equations, at least at length scales much larger than the maximum edge-length. See [36] for an overview of this work, known as the *Regge calculus*. In this paper, however, we will require all edges to have a single fixed length  $\ell$  so that the action is determined only by the structure of  $T$  as an abstract simplicial complex, i.e. only on the way the simplices in  $T$  are attached together. This form of the Regge action has been studied extensively as part of the *dynamical triangulations* (DT) approach to quantum gravity. We write this action as

$$\begin{aligned} \mathcal{A}_{DT}(T, \ell) &= \mathcal{A}_R(T, \ell, \dots, \ell) \\ &= \frac{V_{n-2}(\ell)}{16\pi} \sum_{\tau^{n-2} \in T} (2\pi - \theta_n \text{deg}(\tau^{n-2})) \end{aligned} \tag{5}$$

where  $V_k(\ell) = \frac{\sqrt{k+1}}{k! \sqrt{2^k}} \ell^k$  is the volume of a  $k$ -simplex with all edges of length  $\ell$ ,  $\theta_n = \cos^{-1}(\frac{1}{n})$  is the **dihedral angle** in such a simplex, and  $\text{deg}(\tau)$ , called the **degree** of  $\tau$ , is the number of  $n$ -simplices in  $T$  with  $\tau$  as a face. Usually, we will suppress the dependence on  $\ell$  and write simply  $\mathcal{A}_{DT}(T)$ .

Now for some terminology and preliminary results. Let  $\mathcal{T}(M)$  denote the set of all triangulations of a fixed closed  $n$ -manifold  $M$ . We will write  $\mathcal{T}_K(M)$  for the set of all triangulations of  $M$  containing exactly  $K$   $n$ -simplices, and  $\mathcal{T}_{K,A}(M)$  for those with  $K$   $n$ -simplices and DT-action  $A$ . Since there are only finitely many ways to attach together the faces of a finite collection of  $n$ -simplices,  $\mathcal{T}_K(M)$  and  $\mathcal{T}_{K,A}(M)$  are finite sets. We define  $S(K,A) = \ln|\mathcal{T}_{K,A}(M)|$  to be the **spacetime entropy** of  $M$  for  $K$   $n$ -simplices and action  $A$ . We will also need notation for the **average hinge degree** of a triangulation  $T$ ,

$$\mu(T) = \frac{1}{N_{n-2}(T)} \sum_{\tau^{n-2} \in T} \text{deg}(\tau^{n-2}). \tag{6}$$

By double-counting arguments we may alternately write this as

$$\mu(T) = \binom{n+1}{2} \frac{N_n(T)}{N_{n-2}(T)} = n \frac{N_{n-1}(T)}{N_{n-2}(T)}. \tag{7}$$

*Proof.* Suppose we examine each  $(n-2)$ -simplex  $\tau$  in  $T$  and place a mark on each  $n$ -simplex with  $\tau$  as a face. Clearly we have placed  $\sum_{\tau} \text{deg}(\tau)$  marks. On the other hand, each  $n$ -simplex has  $\binom{n+1}{2}$  codimension-2 faces, so the number of marks is also  $\binom{n+1}{2} N_n(T)$ . Dividing through by  $N_{n-2}(T)$  gives the first equality. Next, suppose we examine each  $(n-1)$ -simplex  $\sigma$  in  $T$  and place a mark on each of the two  $n$ -simplices incident at  $\sigma$ . We have obviously placed  $2N_{n-1}(T)$  marks. However, each  $n$ -simplex has  $n+1$  codimension-1 faces, so the number of marks is also  $(n+1)N_n(T)$  and we have  $2N_{n-1} = (n+1)N_n$ . Plugging into the previous equality and simplifying finishes the proof.

The first part of equation (7) lets us nicely express  $\mathcal{A}_{DT}(T)$  as a function of the number of  $n$ -simplices in  $T$  and its average hinge-degree. We get

$$\mathcal{A}_{DT}(T,\ell) = \frac{V_{n-2}(\ell)}{8} \binom{n+1}{2} N_n(T) \left( \frac{1}{\mu(T)} - \frac{1}{\mu_n^*} \right) \tag{8}$$

where  $\mu_n^* = \frac{2\pi}{\theta_n}$  is called the **flat hinge-degree**. Why do we call  $\mu_n^*$  the *flat* hinge-degree? It is the number of regular  $n$ -simplices needed around a hinge to provide a total dihedral angle of exactly  $2\pi$ , the expected quantity in a flat space. Note that, except in dimension two (where  $\mu_2^* = 6$ ) the quantity  $\mu_n^*$  is not an integer.

*Proof of Equation (8).* We begin with the DT action (5) and distribute the sum into the summand to obtain

$$\mathcal{A}_{DT}(T,\ell) = \frac{V_{n-2}(\ell)}{16\pi} \left( 2\pi N_{n-2}(T) - \theta_n \sum_{\tau^{n-2} \in T} \text{deg}(\tau^{n-2}) \right). \tag{9}$$

By equation (7) we can replace  $N_{n-2}(T)$  with  $\binom{n+1}{2} \frac{N_n(T)}{\mu(T)}$  and the summation by  $\binom{n+1}{2} N_n(T)$  to get

$$\mathcal{A}_R(T,\ell) = \frac{V_{n-2}(\ell)}{16\pi} \left( 2\pi \binom{n+1}{2} \frac{N_n(T)}{\mu(T)} - \theta_n \binom{n+1}{2} N_n(T) \right). \tag{10}$$

Finally, moving a factor of  $2\pi \binom{n+1}{2} N_n(T)$  to the front finishes the derivation.

### Mean Action Per Volume

The primary observable quantity of concern in this work is the **mean action per volume**, i.e. the average Lagrangian density over the manifold:

$$E(T,\ell) = \frac{\mathcal{A}_{DT}(T,\ell)}{V(T,\ell)} \tag{11}$$

where  $V(T,\ell) = V_n(\ell)N_n(T)$  is the PL-volume of  $T$ . We use the symbol  $E$  to remind us that this is a physically well-defined global observable with dimensions of energy per volume. Equation (8) gives a lovely formula for the mean action,

$$E(T,\ell) = C_n \ell^{-2} \left( \frac{1}{\mu(T)} - \frac{1}{\mu_n^*} \right) \tag{12}$$

where  $C_n = \frac{1}{8} \binom{n+1}{2} \frac{V_{n-2}(1)}{V_n(1)}$  depends only on the dimension  $n$ .

This tells us that for a fixed dimension and edge-length the mean-action depends only on the average hinge-degree  $\mu$ . For notational convenience we will usually suppress the  $n$  and  $\ell$  dependence and simply write  $E(\mu)$  or  $E(T)$ .

Finally, note that for a fixed number of  $n$ -simplices  $N_n$  we can use equations (7) and (12) to find the minimum possible separation between mean-actions. This corresponds to changing the number of hinges by one, resulting in a change to  $E$  of

$$\delta E = D_n \cdot \frac{1}{\ell^2 N_n} = F_n \cdot \frac{\ell^{n-2}}{V} \tag{13}$$

where  $D_n = \frac{1}{8} \frac{V_{n-2}(1)}{V_n(1)}$  and  $F_n = \frac{1}{8} V_{n-2}(1)$  depend only on the dimension  $n$  and  $V = N_n V_n(\ell)$  is the total spacetime volume. The minimum possible separation between actions is then given by

$$\delta \mathcal{A} = V \delta E = F_n \ell^{n-2}. \tag{14}$$

### Action Spectrum in Dimension Three

From this point forward, we will restrict attention to dimension three. What can we say about the possible values of  $E$  on  $\mathcal{T}_K(M)$  when  $n=3$ ? This is a formidable problem, since even for a small number of tetrahedra  $K$  the set  $\mathcal{T}_K(M)$  is quite large and complicated. We begin with an elementary result: for any triangulation  $T$  of a closed 3-manifold  $M$  we have

$$N_0 = N_3 \left( \frac{6}{\mu} - 1 \right) \quad \text{and} \quad N_1 = N_3 \frac{6}{\mu} \quad (15)$$

where  $N_i = N_i(T)$  and  $\mu = \mu(T)$ . This means that for a fixed number of 3-simplices, the effect of increasing  $\mu$  (or equivalently, decreasing  $E$ ) is to decrease both the number of vertices  $N_0$  and the number of edges  $N_1$  in the triangulation.

*Proof of Equation (15).* We begin with a well-known topological fact: every closed 3-manifold has Euler characteristic zero. That is, for any triangulation  $T$  of a closed 3-manifold  $M$  we have  $N_0(T) - N_1(T) + N_2(T) - N_3(T) = 0$ . Now, we use equation (7) to replace  $N_2(T)$  by  $2N_3(T)$  to get

$$N_0(T) - N_1(T) + N_3(T) = 0. \quad (16)$$

Using equation (7) again to replace  $N_1(T)$  by  $\frac{6N_3(T)}{\mu(T)}$  and then rearranging gives

$$N_0(T) = N_3(T) \left( \frac{6}{\mu(T)} - 1 \right) \quad (17)$$

as desired. Finally, we plug this  $N_0(T)$  back into equation (16) and simplify to obtain

$$N_1(T) = N_3(T) \frac{6}{\mu(T)} \quad (18)$$

completing the proof.

Equation (15) tells us that to understand the possible values for  $E$  we must understand the possible combinations of  $N_0$  and  $N_1$  that can occur in a triangulation of a given closed 3-manifold. A 1970 paper [48] by Walkup tells us all we need to know.

**Theorem** (Walkup). *For every closed 3-manifold  $M$  there is a smallest integer  $\gamma^*(M)$  so that any two positive integers  $N_0$  and  $N_1$  which satisfy*

$$\binom{N_0}{2} \geq N_1 \geq 4N_0 + \gamma^*(M) \quad (19)$$

are given by  $N_1 = N_1(T)$  and  $N_2 = N_2(T)$  for some  $T \in \mathcal{T}(M)$ . The quantity  $\gamma^*(M)$  is a topological invariant which satisfies  $\gamma^*(M) \geq -10$  for all closed 3-manifolds  $M$ .

Note that  $\gamma^*(M)$  is known for many manifolds  $M$ , see [49], although we will not need this information.

Walkup's Theorem, together with equation (15) and some algebra suffice to prove the central mathematical result in this paper:

**Theorem.** *Let  $M$  be a closed 3-manifold and  $N_3 > 0$  a fixed number of tetrahedra. Then, there are mean actions*

$$E_{max} = E \left( \frac{9}{2} \cdot \frac{N_3}{N_3 - \frac{1}{2}\gamma^*(M)} \right) \quad (20)$$

and

$$E_{min} = E \left( 6 \cdot \frac{N_3}{N_3 + \frac{1}{2}(3 + \sqrt{9 + 8N_3})} \right) \quad (21)$$

so that if  $N_1 > 0$  is an integer for which  $E = E(6N_3/N_1)$  lies in the interval  $(E_{min}, E_{max})$  then  $E = E(T)$  for some triangulation  $T$  of  $M$  with  $N_3$  tetrahedra and  $N_1$  edges. These  $E$  are regularly spaced over the entire interval  $(E_{min}, E_{max})$ , each separated from the next by

$$\delta E = \frac{3}{\sqrt{8}} \cdot \frac{1}{\ell^2 N_3} = \frac{1}{8} \cdot \frac{\ell}{V} \quad (22)$$

where  $V = N_3 V_3(\ell)$ . This is the smallest possible separation given fixed  $N_3$ , so these  $E$  are all possible mean-actions on  $(E_{min}, E_{max})$ .

Note that in most applications, the number of tetrahedra  $N_3$  will be large and the energy densities given in the theorem will be approximately

$$E_{min} \approx E(6) \approx -0.19\ell^{-2} \quad \text{and} \quad E_{max} \approx E\left(\frac{9}{2}\right) \approx 0.17\ell^{-2}. \quad (23)$$

Also note that when edges are Planck's length ( $\ell = 1$  in our units) the magnitude of these energy densities is *enormous*, about  $10^{111}$  Joules per cubic meter.

*Proof of Main Theorem.* Let  $M$  be a closed 3-manifold. We start by showing that if two given integers  $N_1 > 0$  and  $N_3 > 0$  satisfy

$$N_3 + \frac{1}{2}(3 + \sqrt{9 + 8N_3}) \leq N_1 \leq \frac{1}{3}(4N_3 - \gamma^*(M)) \quad (24)$$

then there is some triangulation  $T$  of  $M$  with  $N_1 = N_1(T)$  and  $N_3 = N_3(T)$ . We define  $N_0 := N_1 - N_3$ . Note that  $N_0 > 0$  by the first inequality in (24). A bit of algebra applied to the second inequality in (24) implies

$$N_1 \geq 4N_0 + \gamma^*(M). \quad (25)$$

Now, consider the upward opening parabola  $f(m) = \binom{m}{2} - m - N_3$  which has largest root  $m_0 = \frac{1}{2}(3 + \sqrt{9 + 8N_3})$ . The first inequality in (24) implies  $N_1 - N_3 \geq \frac{1}{2}(3 + \sqrt{9 + 8N_3})$  which is just  $N_0 \geq m_0$ . Since  $m_0$  is the largest root of an upward opening parabola, we conclude  $f(N_0) \geq 0$ . By our definition of  $f$  and  $N_0$ , this tells us

$$\binom{N_0}{2} \geq N_1. \quad (26)$$

By Walkup's theorem, inequalities (25) and (26) imply that some triangulation  $T \in \mathcal{T}(M)$  has  $N_0 = N_0(T)$  and  $N_1 = N_1(T)$ . Finally, by equation (15), we know  $N_3(T) = N_1(T) - N_0(T) = N_3$  as desired.

Next, we divide the inequality (24) by  $6N_3$  and take reciprocals to get

$$\frac{6N_3}{\frac{1}{3}(4N_3 - \gamma^*(M))} \leq \mu \leq \frac{6N_3}{N_3 + \frac{1}{2}(3 + \sqrt{9 + 8N_3})}. \quad (27)$$

where  $\mu = 6N_3/N_1$ . Thus, if  $N_3$  is fixed and  $N_1$  is an integer for which  $\mu = 6N_3/N_1$  lies in this interval, then  $\mu = \mu(T)$  for some

triangulation  $T$  with  $N_3$  tetrahedra. By equation (12) the change in mean-action for each increment of  $N_1$  is as claimed in equation (22), completing the proof.

**The  $N$ -Action Model**

The model used in this paper is designed to be dominated by states near a particular chosen target value  $E^*$  for the mean-action. For a fixed number of tetrahedra  $N_3$  let  $E_0$  be the closest attainable mean-action to  $E^*$ . For each  $N_3$ , our model admits triangulations with mean-action  $E_0$  along with those having one of the  $N$  mean-action values on either side of  $E_0$ . In this paper our target mean-action will be  $E^* = 0$  since the Einstein-Hilbert action for the vacuum in classical general-relativity is zero. Recall that, unlike actions in quantum field theory, the values of the Einstein-Hilbert and Regge actions are well-defined physical observables. This makes such a targeting strategy physically reasonable.

Why not simply start with a model containing only those triangulation  $T$  for which  $E(T) = 0$ ? It turns out that there are no such triangulations. That is, for any triangulation  $T$  of a closed 3-manifold  $M$  we have  $E(T) \neq 0$ , or equivalently  $\mu(T) \neq \mu_3^*$ . This follows from the irrationality of  $\mu_3^*$  and equation (12). We know  $\mu_3^*$  is irrational due to work [50] by Conway, Radin and Sadun on what are called *geodesic angles*. Note that these angles are actually interesting mathematical objects on their own and are central to the solution to Hilbert’s third problem on the *scissors-congruence of polyhedra*.

So, let  $E_{-N}, \dots, E_N$  be the mean-actions in the model and  $\mathcal{A}_{-N}, \dots, \mathcal{A}_N$  the corresponding total actions. Our main theorem implies that for any  $N$  and spacetime volume  $V$  there is an  $\ell$  small enough so that all of the  $2N + 1$  mean-action values  $E_k$  lie within the range  $(E_{min}, E_{max})$  where attainable action-values are regularly spaced. For such  $\ell$  our model has partition function

$$Z = \sum_{k=-N}^N e^{S_k + i(A_0 + k \cdot \delta A)} \tag{28}$$

where  $S_k = S(N_3, \mathcal{A}_k)$  is spacetime entropy at action  $\mathcal{A}_k$ . The expected action for this model is then

$$\langle \mathcal{A} \rangle = \frac{1}{Z} \sum_{k=-N}^N (A_0 + k \cdot \delta A) e^{S_k + i(A_0 + k \cdot \delta A)}. \tag{29}$$

A Euclidean version  $\langle \mathcal{A} \rangle_{Euc}$  of this expected value can be found by applying the standard Wick rotation  $i \mapsto -1$  to the expression above.

It is currently impossible to write  $\langle \mathcal{A} \rangle$  or  $\langle \mathcal{A} \rangle_{Euc}$  as exact closed form expressions since the entropies  $S_k$  are beyond our ability to compute. However, if we replace  $S_k$  with its first order approximation  $S_k = S_0 + k \cdot \eta$  for  $\eta$  a constant, then a closed-form expression can be found. We used the computer-algebra package Mathematica to show

$$\langle \mathcal{A} \rangle = A_0 - \frac{\delta A}{e^{\eta + i\delta A} - 1} + \frac{\delta A}{e^{(2N+1)(\eta + i\delta A)} - 1} + N\delta A \coth[(2N+1)(\eta + i\delta A)]. \tag{30}$$

A closed form expression for  $\langle \mathcal{A} \rangle_{Euc}$  can be obtained as before by replacing  $i$  with  $-1$  in the equation above.

**Choosing  $N$**

How are we to choose  $N$ ? In an ideal world, we would have in hand a fully formed DT-style theory of quantum gravity coupled to matter, which provably reduced to general-relativity at large distances. From this theory we could *derive* an appropriate  $N$  by computing how far a typical spacetime was from the classical action. We believe such a theory will eventually emerge, but it is not yet available. However, we have set up enough machinery to reasonably guess what such a theory would tell us about  $N$ .

Suppose we fix a total spacetime volume  $V$  and consider the  $N$ -action theory targeting mean-action zero. What happens as we let the edge-length  $\ell$  approach zero? Because the separation between actions  $\delta \mathcal{A} = \frac{1}{8} \ell$  goes to zero and  $|A_0| < \delta \mathcal{A}$ , if  $N$  is left fixed as  $\ell \rightarrow 0$  then even the most extreme action values in the theory,  $A_0 \pm N\delta \mathcal{A}$ , would converge to zero. Since we wish to investigate *quantum* gravity, this is unacceptable and we are forced to choose an  $N$  which diverges as  $\ell \rightarrow 0$ . Now, suppose we make the affine entropy approximation  $S_k = S_0 + k \cdot \eta$ . Equation (30) implies that if  $\eta \neq 0$  then for large enough  $N$  and small enough  $\delta \mathcal{A}$  the expected action is dominated by the final hyperbolic cotangent term and we have  $\langle \mathcal{A} \rangle \approx \text{sgn}(\eta) \cdot N\delta \mathcal{A}$ . This tells us that under these conditions, the model is completely dominated by entropy. The oscillating complex phase  $e^{iA}$  which suppresses the contribution of states far from  $A = 0$  is swamped by the entropy term involving  $\eta$ .

Thus, since  $\delta \mathcal{A}$  is proportional to  $\ell$ , it is natural to choose the dimensionless  $N$  to be proportional to  $V^{1/3} / \ell$ . For such a choice we can take the  $\ell \rightarrow 0$  limit and the theory gives a finite non-zero value for the expected action. Therefore, we choose to use

$$N = \frac{V^{1/3}}{\ell} \tag{31}$$

mean-action values on either side of  $E_0$ . Notice that by the approximations (23) even though  $N$  diverges as  $\ell \rightarrow 0$ , all actions in the model eventually lie within the “regularly spaced” range  $(E_{min}, E_{max})$  for small enough  $\ell$ . Also note that as  $\ell \rightarrow 0$  all the mean edge-degrees corresponding to these  $E_i$  converge to the flat mean edge-degree  $\mu_3^*$ .

Finally, for any fixed  $\eta \neq 0$  we can use equation (30) to compute the  $\ell \rightarrow 0$  limit, obtaining

$$\lim_{\ell \rightarrow 0} \langle \mathcal{A} \rangle = \lim_{\ell \rightarrow 0} \langle \mathcal{A} \rangle_{Euc} = \text{sgn}(\eta) \cdot \frac{1}{8} V^{1/3}. \tag{32}$$

For  $\eta = 0$  we get a purely imaginary standard expectation  $\lim_{\ell \rightarrow 0} \langle \mathcal{A} \rangle = i \left[ 1 - \frac{1}{8} V^{1/3} \cot\left(\frac{1}{8} V^{1/3}\right) \right]$  and a Euclidean expectation given by  $\lim_{\ell \rightarrow 0} \langle \mathcal{A} \rangle_{Euc} = 1 - \frac{1}{8} V^{1/3} \coth\left(\frac{1}{8} V^{1/3}\right)$ .

**Evidence for the Entropies  $S_k$**

The calculation of the expected action as  $\ell \rightarrow 0$  given by equation (32) depends on two assumptions about the entropies  $S_k$ . First, for the states contributing to the model, spacetime entropy must be an approximately linear function of mean-action, i.e.  $S_k \approx S_0 + k \cdot \eta$ , at least for large enough  $N_3$ . Second, this  $\eta$  must not approach zero as  $N_3 \rightarrow \infty$ . In this section, we present evidence from Monte-Carlo simulations and small- $N_3$  enumerations that strongly supports these assumptions.

### Monte-Carlo Sampling Results

To measure the dependence of entropy on mean-action we use a Metropolis-Hastings algorithm to take samples  $T$  from  $\mathcal{T}(M)$  near a given number of tetrahedra and mean-action. The algorithm wanders among the elements of  $\mathcal{T}(M)$  by using the well-known *Pachner moves* to change from one triangulation to another, repeatedly choosing a random move and executing it with probability  $e^{-\Delta U}$  where  $U$  is some non-negative objective function. Metropolis proved that if we wait long enough between samples, then each sample  $T$  occurs with probability  $e^{-U(T)}$ . Here, we use a quadratic objective function

$$U(T) = \alpha(E(T) - E^\dagger)^2 + \beta(N_3(T) - N_3^\dagger)^2 \quad (33)$$

with  $\alpha > 0$  and  $\beta > 0$  fixed constants. This form for  $U$  keeps the sampled triangulations near a target mean-action  $E^\dagger$  and number of tetrahedra  $N_3^\dagger$ .

If there were equally many triangulations at each  $E$  and  $N_3$  then our sampled pairs  $(E, N_3)$  would form a Gaussian distribution centered at the target point  $(E^\dagger, N_3^\dagger)$ . If our samples have a Gaussian distribution but with mean  $(\bar{E}, \bar{N}_3)$  significantly displaced from the target, this indicates a *linear* dependence of spacetime entropy on  $E$  and  $N_3$  with the magnitude of the dependence proportional to the size of this displacement. Since it is obvious that spacetime entropy is strongly dependent on  $N_3$  and because the relative deviation from the mean for  $N_3$  is at most  $\approx 1\%$  in our data, we focus solely on deviation in mean-action  $\bar{E} - E^\dagger$ . From this we can estimate the change entropy (per mean-action step)  $\eta$ , in nats, using

$$\eta \approx 2\alpha(\bar{E} - E^\dagger)\delta E. \quad (34)$$

The sampling trials conducted for this paper use the 3-sphere  $M = S^3$  with target mean-action zero ( $E^\dagger = 0$ ) and various targets for the number of tetrahedra  $500 \leq N_3^\dagger \leq 7000$ . In all cases, we take  $\alpha = 3.5 \times 10^6$  and  $\beta = 1.0 \times 10^{-2}$ . In order to ensure independent samples, the algorithm attempts Pachner moves until  $\approx 10$  accepted moves per tetrahedron have occurred. We checked that this wait time was sufficient using standard correlation tests. For these parameters, each sample was uncorrelated from the next. We also checked that the sampled  $N_3$  and  $E$  were independent. As desired, samples are approximately normally distributed with sample mean  $\bar{E}$  somewhat displaced from the target  $E^\dagger = 0$ . This indicates that entropy is approximately a linear function of mean-action near  $E = 0$ , as was assumed in the previous section. See Figure 1 for a histogram of mean-actions for 2700 samples at  $N_3^\dagger = 1701$ . For each such distribution, we use equation (34) to infer the approximate change in entropy  $\eta$  between mean-actions. These  $\eta$  are comfortably negative and do not appear to approach zero as  $N_3^\dagger$  gets larger, validating our second assumption. See Figure 2. Copies of the code used for triangulation sampling are available on request.

### Triangulation Census Data

In addition to Monte-Carlo sampling evidence, one can also see a bias towards negative action states in computer-generated censuses of 3-manifolds triangulations. In particular, recent

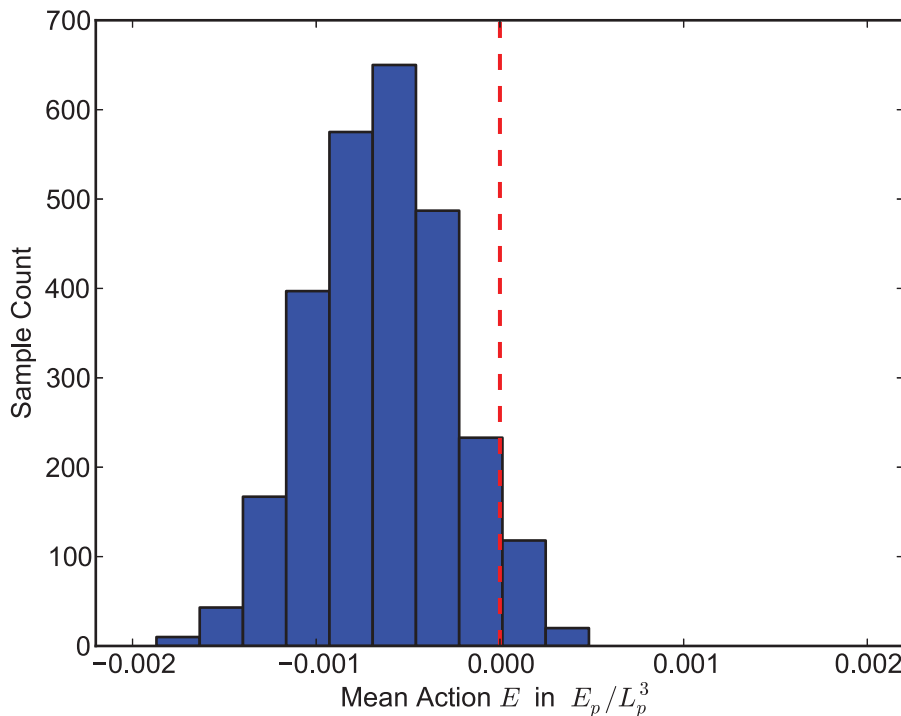

**Figure 1. Monte-Carlo sampling of triangulations of  $S^3$  near mean-action zero.** We plot the distribution of mean actions  $E$  at  $\ell = 1$  for 2700 sampled triangulations of the 3-sphere  $S^3$ . Samples were obtained from a Metropolis-Hastings algorithm using Pachner moves and a quadratic objective function  $\alpha(E - E^\dagger)^2 + \beta(N_3 - N_3^\dagger)^2$  targeting  $E^\dagger = 0$  and  $N_3^\dagger = 1701$  with  $\alpha = 3.5 \times 10^6$  and  $\beta = 1.0 \times 10^{-2}$ . Waiting times were chosen so that  $\approx 10$  accepted moves per tetrahedra occurred between successive samples. Observed means were  $\bar{N}_3 = 1770$  with standard deviation  $\sigma = 7.0$  and  $\bar{E} = -6.3 \times 10^{-4}$  with standard deviation  $\sigma = 3.7 \times 10^{-4}$ . Note that  $\ell$  and  $E$  are given in Planck units,  $L_p$  and  $E_p/L_p^3$  respectively. doi:10.1371/journal.pone.0080826.g001

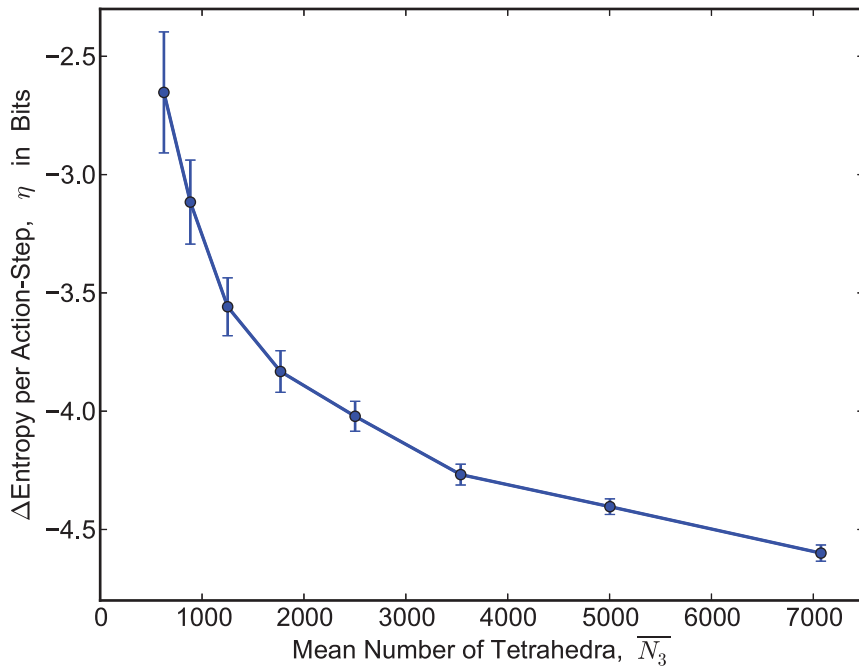

**Figure 2. Entropy remains a decreasing function of mean-action as the number of tetrahedra grows.** We plot the change in spacetime entropy,  $\eta$  in bits, due to each minimal increase  $\delta E$  in mean-action for the 3-sphere  $S^3$  near  $E=0$ , versus mean number of tetrahedra  $\bar{N}_3$ . Values were inferred from the bias seen in Monte-Carlo samples of triangulations near  $E=0$ . See Figure 1. All data points except the last two were computed from 2700 samples. At the two largest  $\bar{N}_3$  values, we used 2394 and 1108 samples respectively. Error bars indicate 95% confidence intervals. doi:10.1371/journal.pone.0080826.g002

advances in enumeration algorithms have allowed for the creation of an explicit list of all triangulations of any closed 3-manifold using at most 11 tetrahedra. See [51,52]. Unfortunately, the definition of a “triangulation” used in these censuses is slightly more general than ours. They define a triangulation

of a closed 3-manifold  $M$  as a space homeomorphic to  $M$  obtained by identifying the faces of some finite set of tetrahedra. We believe this to be a largely technical distinction, and we expect this data to provide a good guide to the general features of our set of triangulations  $\mathcal{T}(M)$ . See Figure 3 for a

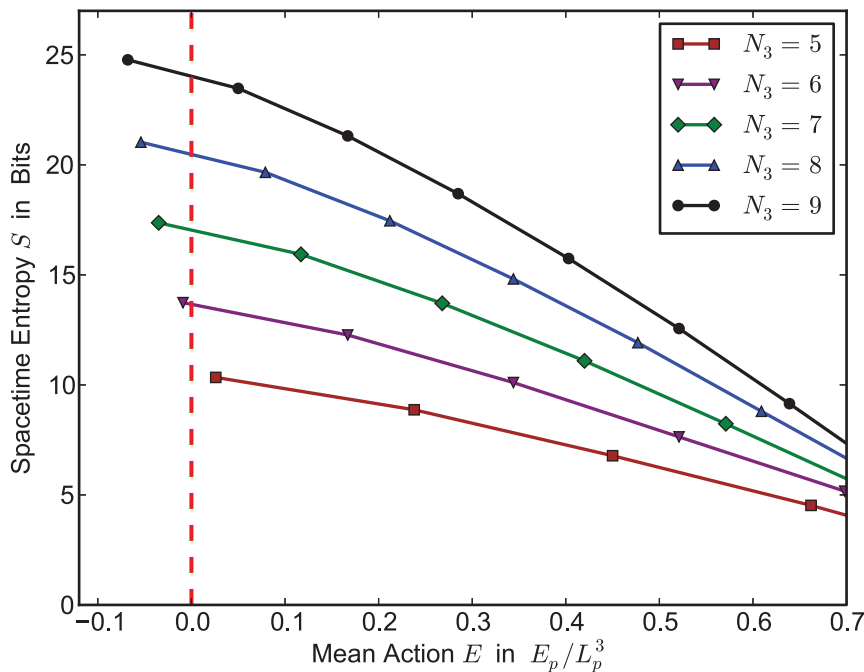

**Figure 3. Entropy versus mean-action from triangulation census data.** We plot spacetime entropy  $S$  in bits for the three-sphere  $S^3$  at various numbers of tetrahedra  $N_3$ , versus mean action  $E$  at  $\ell=1$ . Data come from a complete census [51,52] of the  $\approx 47$  million triangulations of  $S^3$  with at most 9 tetrahedra. Note that  $\ell$  and  $E$  are given in Planck units,  $L_p$  and  $E_p/L_p^3$  respectively. doi:10.1371/journal.pone.0080826.g003

graph of spacetime entropy versus mean-action for the 3-sphere  $S^3$  and  $5 \leq N_3 \leq 9$ . We observe two trends in the data. First, as we expect, the number of triangulations increases as the number of 3-simplices grows. However we also see the same effect as observed in the Monte-Carlo sampling experiments: the number of triangulations at a given action is a *decreasing function of action*.

## The Origin of Dark Energy

Taking  $\eta < 0$  and dividing through by  $V$  in equation (32) gives

$$\lim_{\ell \rightarrow 0} \langle E \rangle = \lim_{\ell \rightarrow 0} \langle E \rangle_{\text{Euc}} = -\frac{1}{8} V^{-\frac{2}{3}}. \quad (35)$$

Let us briefly discuss the physical meaning of  $\langle E \rangle$ . Our goal was to construct a theory dominated by states close to the classical value of the mean-action,  $E=0$ . We did this by “slicing” the partition function according to action-value, retaining only states whose actions lie within a certain distance of zero. If the volume of spacetime is large compared to Planck’s volume then we come very close to accomplishing our goal. That is, for  $V \gg 1$  we do indeed obtain  $\langle E \rangle \approx 0$  in the  $\ell \rightarrow 0$  limit. However, there is a small perturbation away from zero because of the relative entropy of action values. Notice that since action values are global observables, this effect is independent of the local details of the “metric”, i.e. the local structure of the triangulation. This leads us to expect that, for a typical triangulation at a given  $\ell$ , the average action will appear very uniform at length-scales much larger than  $\ell$ . Finally, recall that everything in the Einstein-Hilbert action *except* the cosmological constant  $\Lambda$  depends on the metric  $g_{\mu\nu}$ . Thus, the basic structure of  $\mathcal{A}_{EH}$  almost demands we interpret our non-zero  $\langle E \rangle$  as an emergent cosmological constant given by

$$\Lambda = -\frac{1}{2} \langle E \rangle = \frac{1}{16} V^{-\frac{2}{3}}. \quad (36)$$

We now turn to the question of applying this result to our own universe. This is a somewhat speculative endeavor since our world appears to be both 4-dimensional and infinite in extent. However, as an entropic effect connected with the pattern of attachment between simplices, we expect the perturbation away from  $E=0$  identified in this paper to occur quite generally. So, what  $V$  is appropriate for assessing the magnitude of this effect in our particular universe? Considerations of causality give us a reasonable answer: take the volume of space which has had time to causally communicate with our point of observation. That is, we ought to use something like the current *Hubble volume*  $H_0^{-3}$  where  $H_0$  is the Hubble constant. Plugging in  $H_0 \approx 1.2 \times 10^{-61}$  in Planck units gives

$$\Lambda \approx 10^{-123} \quad (37)$$

which is in general agreement with observation.

At this point, we feel obliged to briefly discuss the term “numerology”. It has long been known that the observed cosmological constant was approximately  $H_0^2$ . This and many other unexplained approximate numerical relationships between cosmological parameters are often called *large number coincidences*.

Thinking of them as having explanatory power on their own is surely deserving of the label “numerology”. However, this epithet should not be applied to a physically well-motivated theory which predicts *ab-initio* such a numerical relationship, as our model does.

## Discussion

Our derivation of  $\Lambda$  has some interesting features. Using the Hubble parameter to define our characteristic volume  $V$  means that the model actually predicts a time-varying cosmological constant

$$\Lambda(t) \approx \frac{1}{16} H(t)^2 \quad (38)$$

where  $H(t)$  is the Hubble parameter at proper time  $t$ . That is, we predict that  $\Lambda$  scales like the area of the cosmic horizon. Amazingly, although we made no holographic assumption, this is the same behavior that emerges from *holographic dark energy* (HDE) theories [5,6,10,12,13]. In fact, our model shares several other key features with these approaches, including the presence of two “cut-offs” in the theory which are removed in a coordinated fashion. HDE models typically contain both a UV and IR field cut-off which are removed in a way that saturates entropy in the Bekenstein bound. In our theory, the cut-offs  $\ell$  and  $N$  are chosen to keep the entropic perturbation on  $\langle E \rangle$  bounded as  $\ell \rightarrow 0$ . While HDE theories are very different in detail from our model, the broad similarities are quite striking. Perhaps both approaches are pointing to the same underlying physical issues. We hope that the relative simplicity of our model can help elucidate these issues.

We should also mention another explanation for  $\Lambda$  which shares some features with our approach. In [53] it is argued that the true ground-state vacuum has  $\Lambda=0$  but that we observe  $\Lambda>0$  because the universe has not yet had time to decay into this ground state. The author considers a model in which the true ground state is given by the superposition of two degenerate  $\Lambda>0$  states, one of which describes the universe’s present-day vacuum. Since the decay probability in a given volume and time period is related to the energy density  $\Lambda$ , the requirement that no such decay has yet happened in the Hubble volume provides an estimate for  $\Lambda$  which agrees with observation. This argument leads, as does our model, to a connection between the Hubble parameter and  $\Lambda$ . Also note that both models contain states at or near  $\Lambda=0$  which are suppressed compared to the  $\Lambda>0$  states.

Finally, we note that in the very early universe our model predicts large  $\Lambda$  and hence rapid expansion. This raises the tantalizing possibility that big-bang inflation and dark-energy are manifestations of a common effect, though it is likely that a more sophisticated choice for the characteristic volume  $V$  would be needed. See [54] for consideration of this idea in the HDE context.

## Acknowledgments

The author would like to thank Cheryl Koester, C. Scott Wylie, Vadas Gintautas, Joe MacNeil, and Larry Viehland for their support and valuable advice. Also, many thanks to Henry Segerman for providing the triangulation census data used in this work and to Leah Langer for assisting in the collection and verification of triangulation sampling data.

## Author Contributions

Conceived and designed the experiments: ADT. Performed the experiments: ADT. Analyzed the data: ADT. Wrote the paper: ADT.



## References

- Allen SW, Schmidt RW, Ebeling H, Fabian AC, Van Speybroeck L (2004) Constraints on dark energy from chandra observations of the largest relaxed galaxy clusters. *Monthly Notices of the Royal Astronomical Society* 353: 457–467.
- Tegmark M, Strauss MA, Blanton MR, Abazajian K, Dodelson S, et al. (2004) Cosmological parameters from sdss and wmap. *Phys Rev D* 69: 103501.
- Kowalski M, Rubin D, Aldering G, Agostinho RJ, Amadon A, et al. (2008) Improved cosmological constraints from new, old, and combined supernova data sets. *The Astrophysical Journal* 686: 749.
- Larson D, Dunkley J, Hinshaw G, Komatsu E, Nolte MR, et al. (2011) Seven-year Wilkinson microwave anisotropy probe (wmap) observations: Power spectra and wmap-derived parameters. *The Astrophysical Journal Supplement Series* 192: 16.
- Cohen AG, Kaplan DB, Nelson AE (1999) Effective field theory, black holes, and the cosmological constant. *Physical Review Letters* 82: 4971–4974.
- Horvat R (2004) Holography and a variable cosmological constant. *Phys Rev D* 70: 087301.
- Hsu S (2004) Entropy bounds and dark energy. *Physics Letters B* 594: 13–16.
- Huang Q, Li M (2004) The holographic dark energy in a non-flat universe. *Journal of Cosmology and Astroparticle Physics* 2004: 013.
- Li M (2004) A model of holographic dark energy. *Physics Letters B* 603: 1–5.
- Li M, Wang Y (2010) Quantum uv/ir relations and holographic dark energy from entropic force. *Physics Letters B* 687: 243–247.
- Caravelli F, Modesto L (2011) Holographic effective actions from black holes. *PhysLett B* 702: 307–311.
- Easson DA, Frampton PH, Smoot GF (2011) Entropic accelerating universe. *Physics Letters B* 696: 273–277.
- Castorina P (2012) Holographic bound in quantum field energy density and cosmological constant. <http://arxiv.org/abs/12073478>.
- Jamil M, Saridakis EN, Setare MR (2009) Holographic dark energy with varying gravitational constant. *Physics Letters B* 679: 172–176.
- Ma T, Wang S (2012) Gravitational field equations and theory of dark matter and dark energy. [arXiv preprint arXiv:12065078](http://arxiv.org/abs/12065078).
- Amendola L, Tsujikawa S (2010) *Dark energy: theory and observations*. Cambridge University Press.
- Bamba K, Capozziello S, Nojiri S, Odintsov S (2012) Dark energy cosmology: the equivalent description via different theoretical models and cosmography tests. *Astrophysics and Space Science* 342: 155–228.
- Hu BL (2009) Emergent/quantum gravity: macro/micro structures of spacetime. *Journal of Physics: Conference Series* 174: 012015.
- Steinacker H (2009) Emergent gravity and noncommutative branes from yangmills matrix models. *Nuclear Physics B* 810: 1–39.
- Cai R, Cao L, Ohta N (2010) Friedmann equations from entropic force. Available: <http://arxiv.org/abs/10013470>.
- Gao C (2010) Modified entropic force. *Phys Rev D* 81: 087306.
- Nicolini P (2010) Entropic force, noncommutative gravity, and ungravity. *Phys Rev D* 82: 044030.
- Modesto L, Randono A (2010) Entropic Corrections to Newton's Law.
- Verlinde E (2011) On the origin of gravity and the laws of newton. *Journal of High Energy Physics* 2011: 1–27.
- Regge T (1961) General relativity without coordinates. *Il Nuovo Cimento* (1955–1965) 19: 558–571.
- Roek M, Williams RM (1981) Quantum regge calculus. *Physics Letters B* 104: 31–37.
- Hamber HW (1994) Invariant correlations in simplicial gravity. *Phys Rev D* 50: 3932–3941.
- Hamber H, Williams R (1995) Newtonian potential in quantum regge gravity. *Nucl Phys B* 435: 361–398.
- Beirl W, Hauke A, Homolka P, Markum H, Riedler J (1997) Correlation functions in lattice formulations of quantum gravity. *Nucl Phys B (Proc Suppl)* 53: 735–738.
- Gentle AP (2002) Regge calculus: A unique tool for numerical relativity. *General Relativity and Gravitation* 34: 1701–1718.
- Gentle AP (2012) A cosmological solution of regge calculus. Available: <http://arxiv.org/abs/12081502>.
- Agishtein M, Migdal A (1992) Simulations of four-dimensional simplicial quantum gravity as dynamical triangulation. *Mod Phys Lett A* 7: 1039–1061.
- Ambjørn J (1995) Quantum gravity represented as dynamical triangulations. *Class Quantum Grav* 12: 2079–2134.
- Ambjørn J, Burda Z, Jurkiewicz J, Kristjansen C (1992) Quantum gravity represented as dynamical triangulations. *Acta Phys Pol B* 23: 991–1030.
- Catterall S, Kogut J, Renken R (1994) Phase structure of four-dimensional simplicial quantum gravity. *Phys Lett B* 328: 277–283.
- Loll R (1998) Discrete approaches to quantum gravity in four dimensions. *Living Reviews in Relativity* 1.
- Ambjørn J, Jurkiewicz J, Loll R (2004) Emergence of a 4d world from causal quantum gravity. *Phys Rev Lett* 93: 131301.
- Benedetti D, Henson J (2009) Spectral geometry as a probe of quantum spacetime. *Phys Rev D* 80: 124036.
- Ambjørn J, Grlich A, Jurkiewicz J, Loll R, Gizbert-Studnicki J, et al. (2011) The semiclassical limit of causal dynamical triangulations. *Nuclear Physics B* 849: 144–165.
- Ambjørn J, Jurkiewicz J, Loll R (2010) Causal dynamical triangulations and the quest for quantum gravity. Available: <http://arxiv.org/abs/10040352/>.
- Khatsymovsky V (2001) Continuous matter fields in regge calculus. *Physics Letters B* 504: 356–358.
- McDonald JR (2009) *Simplicial Matter in Discrete and Quantum Spacetimes*. Ph.D. thesis, Florida Atlantic University.
- Khavkine I, Loll R, Reska P (2010) Coupling a point-like mass to quantum gravity with causal dynamical triangulations. *Classical and Quantum Gravity* 27: 185025.
- Stone DA (1973) Sectional curvature in piecewise linear manifolds. *Bulletin of the American Mathematical Society* 79: 1060–1063.
- Trout AD (2010) Positively curved combinatorial 3-manifolds. *Electronic Journal of Combinatorics* 17.
- Deza M, Detour M, Shrogrin M (2004) On simplicial and cubical complexes with small valence. *Israel Journal of Mathematics* : 109–124.
- Elder M, McCammond J, Meier J (2003) Combinatorial conditions that imply word-hyperbolicity for 3-manifolds. *Topology* 42(6): 1241–1259.
- Walkup DW (1970) The lower bound conjecture for 3- and 4-manifolds. *Acta Mathematica* 125: 75–107.
- Lutz FH, Sulanke T, Swartz E (2009) f-vectors of 3-manifolds. *the electronic journal of combinatorics* 16: R13.
- Conway JH, Radin C, Sadun L (1999) On angles whose squared trigonometric functions are rational. *Discrete and Computational Geometry* 22: 321–332.
- Burton BA (2004) Efficient enumeration of 3-manifold triangulations. *The Australian Mathematical Society Gazette* 31: 111–117.
- Burton BA (2011) Detecting genus in vertex links for the fast enumeration of 3-manifold triangulations. In: *ISSAC 2011: Proceedings of the 36th International Symposium on Symbolic and Algebraic Computation*. 59–66.
- Yokoyama J (2002) Cosmological constant from degenerate vacua. *Phys Rev Lett* 88: 151302.
- Easson DA, Frampton PH, Smoot GF (2012) Entropic inflation. *International Journal of Modern Physics A* 27: 1250066.
